# Supplementary material for: Nanoscale effects of TiO2nanoparticles on the rheological behaviors of ultra-high molecular weight polyethylene (UHMWPE)
Source: Royal Society of Chemistry journal article supplement (doi:10.1039/d3sm00168g), 2023-01-01
Supplement: d3sm00168g1.pdf [file d3sm00168g1.pdf]

1

## Supplementary Materials

2 **Nanoscale effects of TiO<sub>2</sub> nanoparticles on the rheological behaviors of ultra-high molecular**  
3 **weight polyethylene (UHMWPE)**

4

5 *Yang Sui<sup>a, b</sup>, Yi Cui<sup>a, b</sup>, Chuanbo Cong<sup>a, b</sup>, Xiaoyu Meng<sup>a, b</sup>, Haimu Ye<sup>a, b</sup>, Qiong Zhou<sup>a, b\*</sup>*

6

7 The mechanism of the surface modification of nano-TiO<sub>2</sub> by KH570 is shown as **scheme 1**<sup>1</sup>, which  
8 is very similar to our previous study<sup>2</sup>. The chemical formula is CH<sub>2</sub>=C(CH<sub>3</sub>)COO(CH<sub>2</sub>)Si(OCH<sub>3</sub>)<sub>3</sub> and  
9 its reaction with nano-TiO<sub>2</sub> consists of three steps: (1) the -R group attaches to the silicon atom  
10 hydrolyzes to form Si-OH oligosiloxane; (2) the Si-OH in oligosiloxane forms a hydrogen bond with the  
11 -OH on the surface of nano-TiO<sub>2</sub>; (3) covalent bond with TiO<sub>2</sub> is formed along with dehydration reaction  
12 during the heating process.

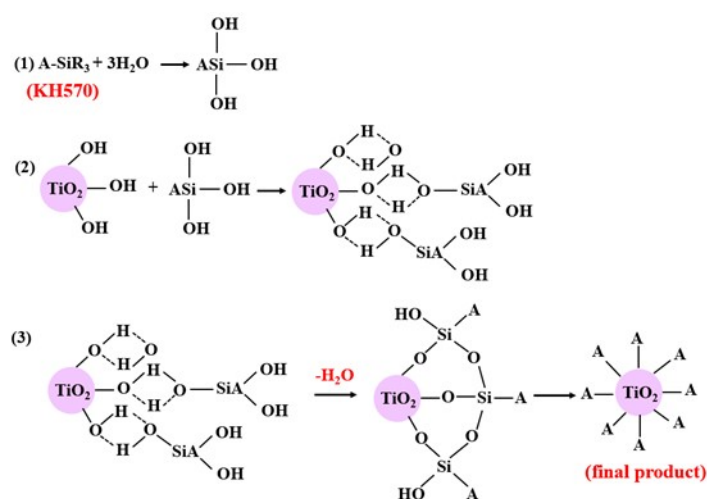

13

14 **Scheme S1.** Mechanism of the surface modification of TiO<sub>2</sub> nanoparticles by KH570 (A stands for

15 CH<sub>2</sub>=C(CH<sub>3</sub>)COO(CH<sub>2</sub>) and R is OCH<sub>3</sub>)

16

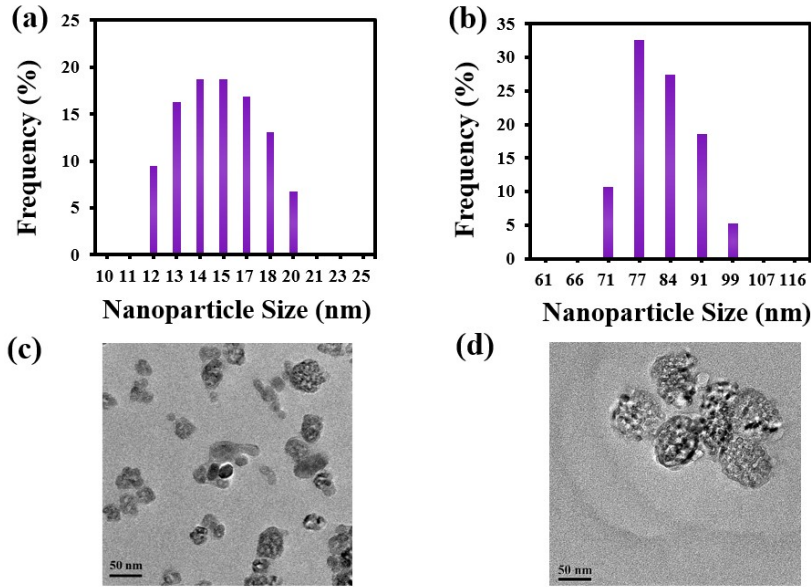

1

2 **Fig. S1.** Size distribution of modified (a) 6-10 nm and (b) 70 nm TiO<sub>2</sub> nanoparticles. TEM morphologies

3 images of modified (c) 6-10 nm and (d) 70 nm nanoparticles.

4

5

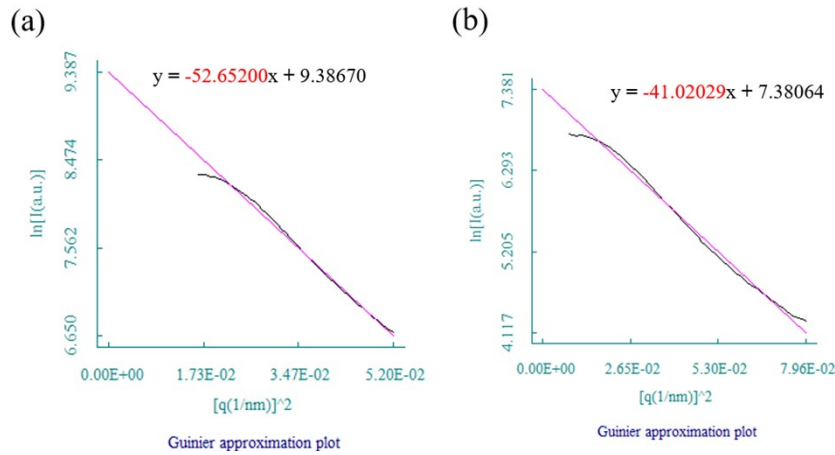

6

7

8 **Fig. S2.** Guinier approximation plot of pure UHMWPE (a) and the UHMWPE/0.3% TiO<sub>2</sub> composite

9 (b).

10

11 The natural logarithm of the equation  $I(q) = I(0)\exp(-R_g^2q^2/3)$  [29] is

12  $\ln I(q) = \ln I(0) - R_g^2q^2/3$ . Then the gyration radius of the sample ( $R_g$ ) can be calculated through the

13 slope of Guinier approximation plot, that is Slope =  $-R_g^2/3$ . For pure UHMWPE,

14  $R_g = \sqrt{(-3) \times (-52.65200)} = 12.57$  nm; For UHMWPE/0.3% TiO<sub>2</sub>,  $R_g = \sqrt{(-3) \times (-41.02029)}$

1 = 11.09 nm.

2 References:

3 1. J. Liu, J. Yu, M. He and S. Lu, Chinese Journal of Colloid & polymer, 2010, 28, 19-21.

4 2. Y. Cui, Y. Sui, P. Wei, Y. Lv, C. Cong, X. Meng, H. Ye and Q. Zhou, Nanomaterials, 2023, 13, 1096.

5
